# Supplementary material
Source: PubMed Central journal article supplement (PMC3010193)
Supplement: supp_124_2_280__6.pdf [file supp_124_2_280__6.pdf]

Sp100 co-localisation

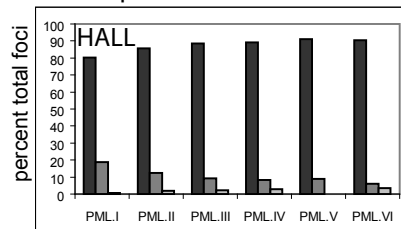

hDaxx co-localisation

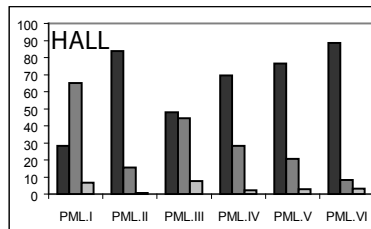

ATRAX co-localisation

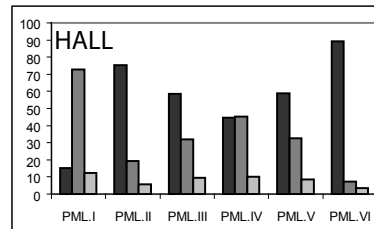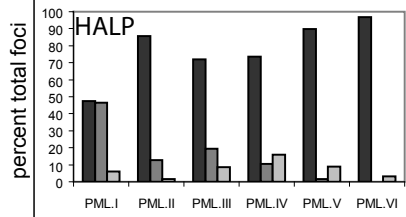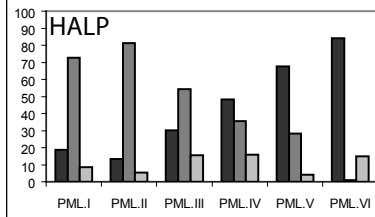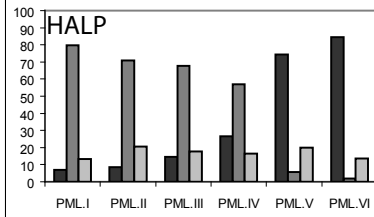

PML+Sp100
  PML alone
  Sp100 alone

PML+hDaxx
  PML alone
  hDaxx alone

PML+ATRAX
  PML alone
  ATRAX alone
