# Supplementary material
Source: PubMed Central journal article supplement (PMC3010193)

Figure S1

A

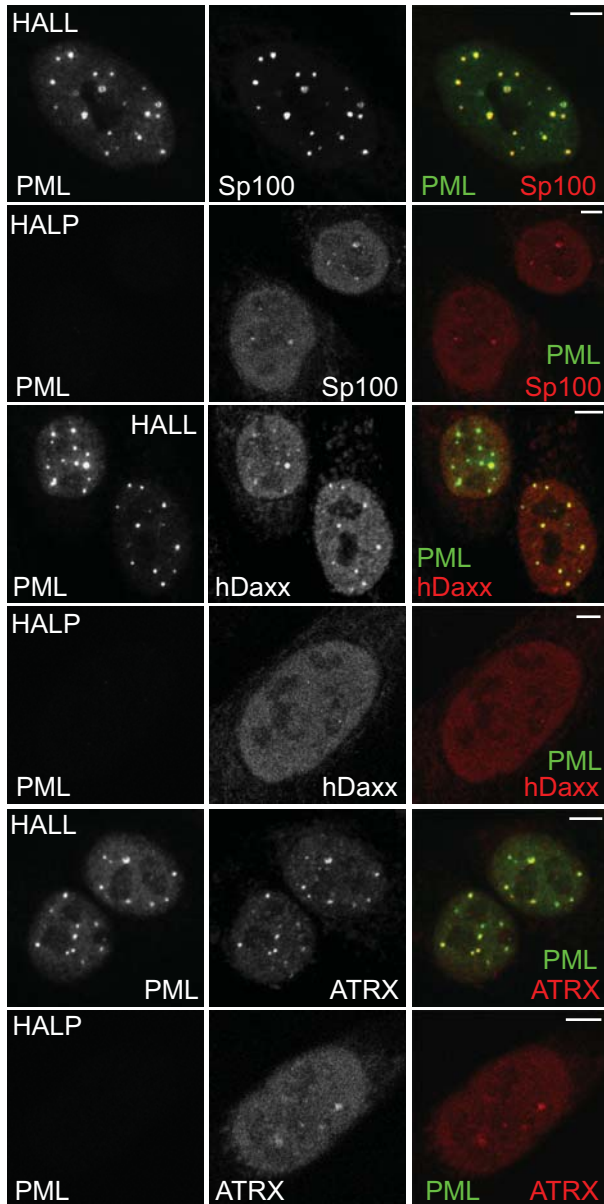

B

Quantification of PML and ND10 protein co-localisation in HALL cells

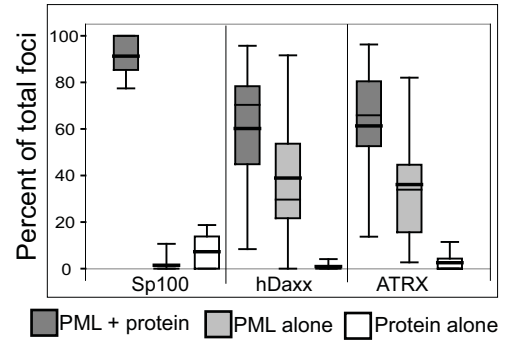

Supplement: supp_124_2_280__1.pdf [file supp_124_2_280__1.pdf]

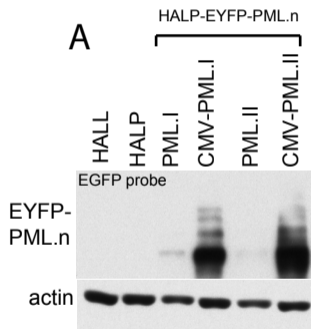

Relative efficiency of  
plaque formation

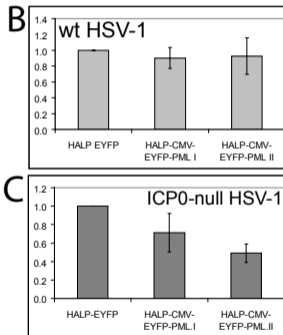

Supplement: supp_124_2_280__2.pdf [file supp_124_2_280__2.pdf]

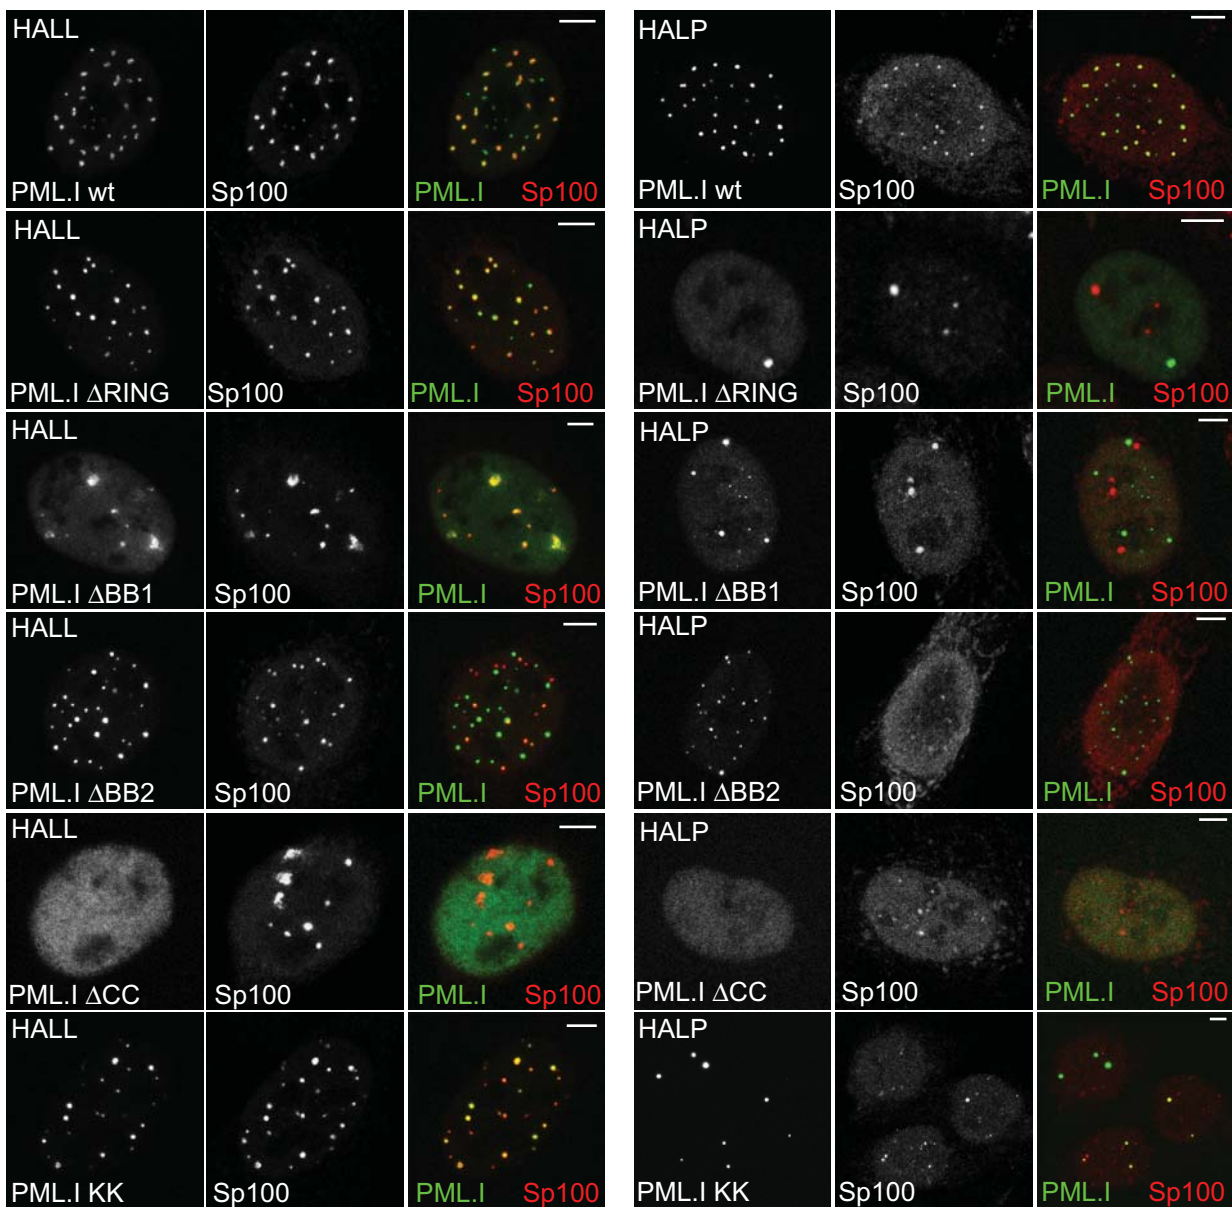

Supplement: supp_124_2_280__3.pdf [file supp_124_2_280__3.pdf]

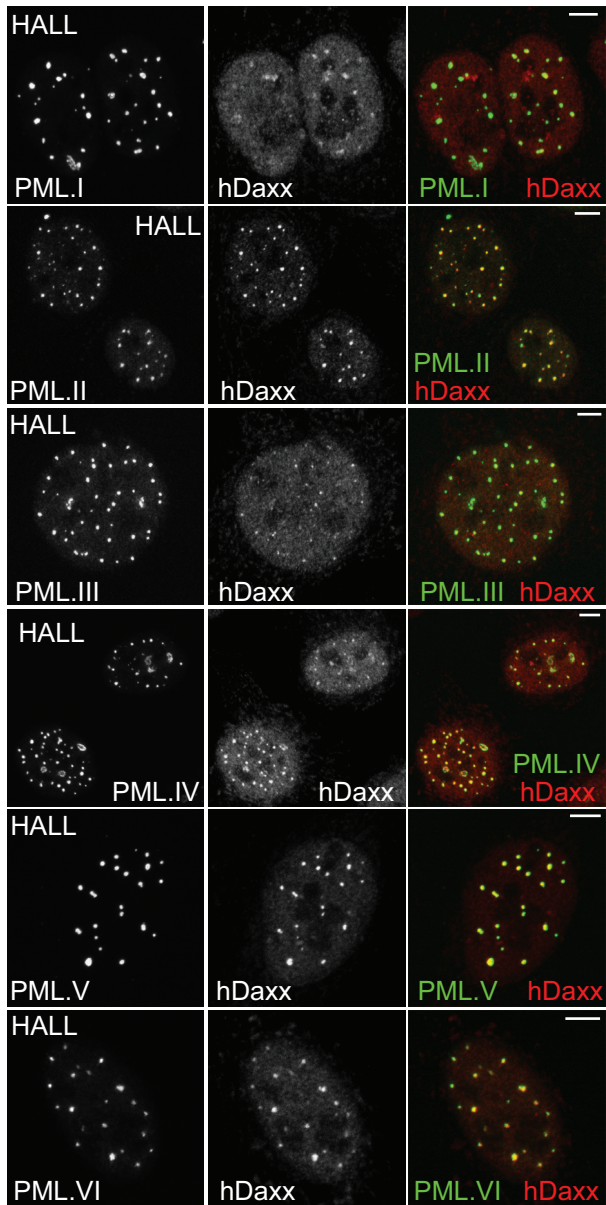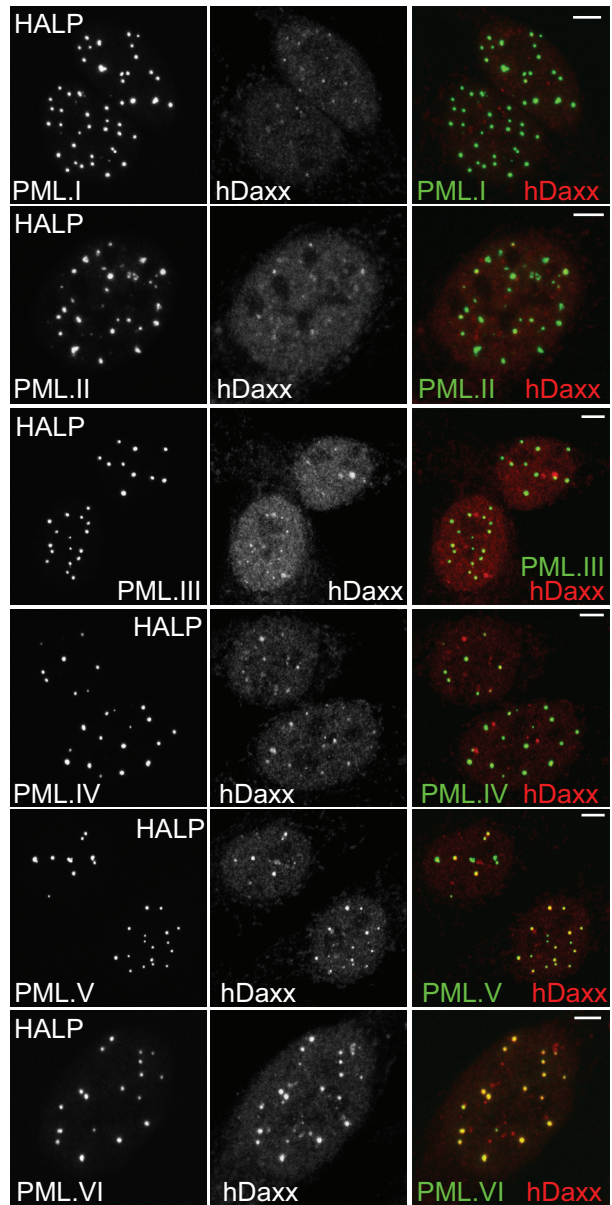

Supplement: supp_124_2_280__4.pdf [file supp_124_2_280__4.pdf]

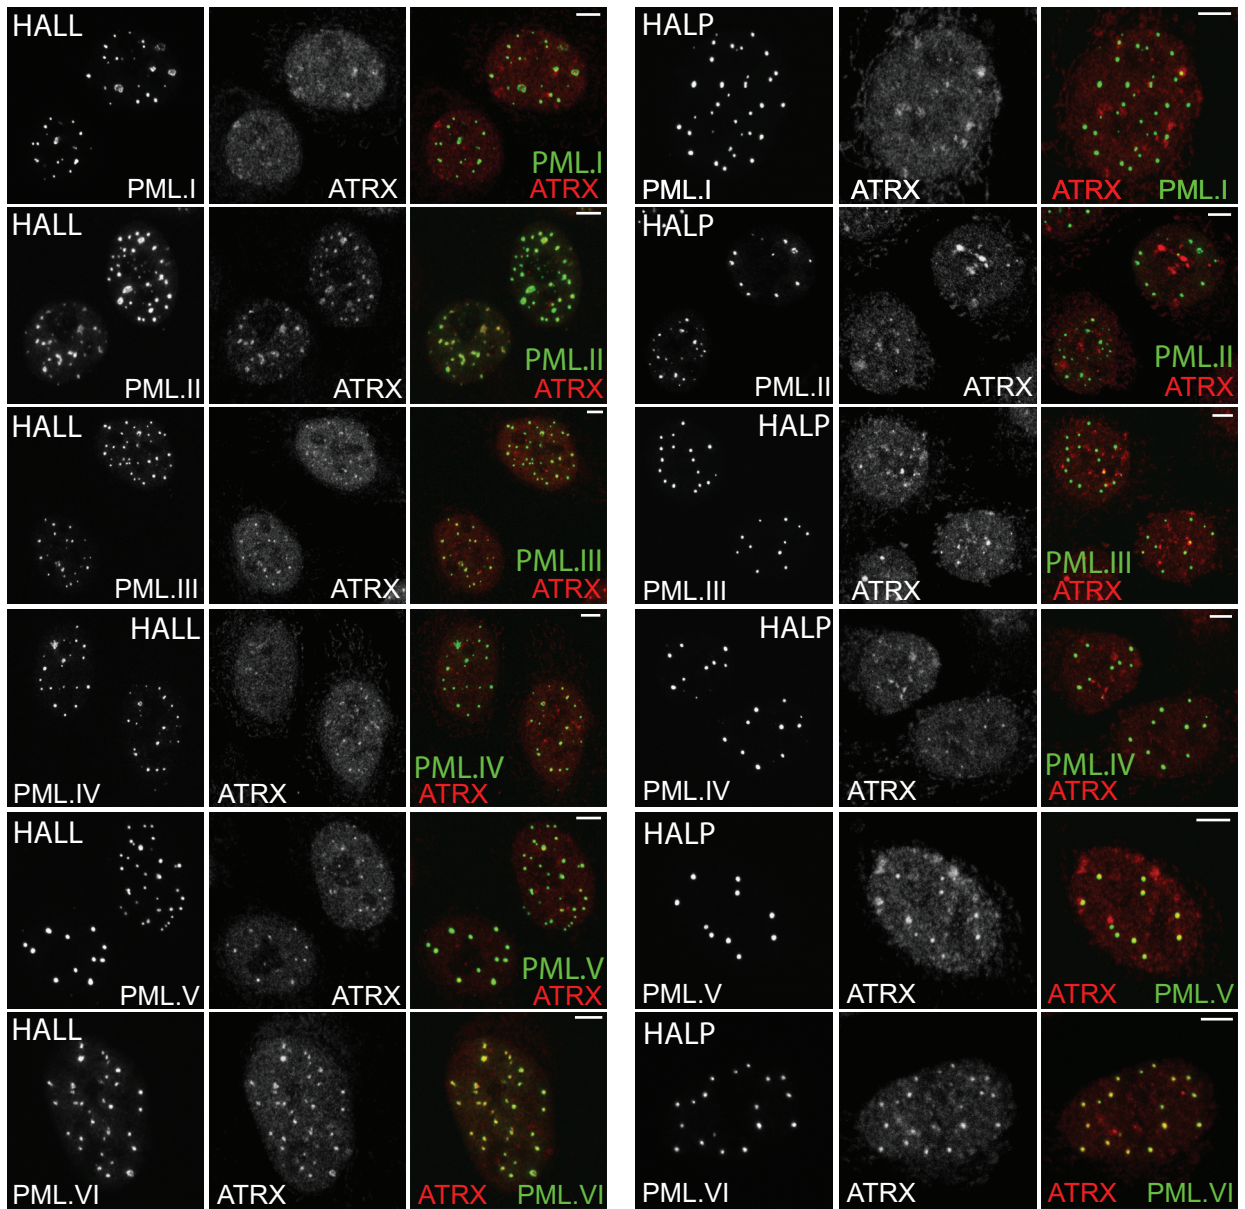

Figure S5

Supplement: supp_124_2_280__5.pdf [file supp_124_2_280__5.pdf]
